# Supplementary material for: Nucleic Acid Catalysis under Potential Prebiotic Conditions
Source: PubMed Central journal article supplement (PMC7003795; doi:10.1002/asia.201901205), 2019-12-09
Supplement: ASIA-15-214-s001.pdf [file ASIA-15-214-s001.pdf]

## **Author Contributions**

K.L. Conceptualization: Equal; Visualization: Lead; Writing - Original Draft: Lead; Writing - Review & Editing: Lead

E.S. Writing - Original Draft: Equal; Writing - Review & Editing: Supporting

E.S. Writing - Original Draft: Equal; Writing - Review & Editing: Supporting

H.M. Conceptualization: Lead; Funding acquisition: Lead; Project administration: Lead; Resources: Lead; Supervision: Lead; Visualization: Supporting; Writing - Original Draft: Lead; Writing - Review & Editing: Lead.
